# Supplementary material
Source: publisher site journal article supplement (https://www.dovepress.com/article/566461)
Supplement: Supplementary file 1 [file 566461%20Revised%20%2509Supplementary%20material.docx]

| Dear Participant：  We are researchers from the Second Affiliated Hospital of Chongqing Medical University, and we sincerely invite you to participate in our research study. This study aims to understand the knowledge, attitudes, and practices of patients with chronic lower limb ischemia regarding disease management, which will provide a basis for developing scientific early intervention strategies. This may help more people in the future and improve patients' health. Your participation in this study is voluntary. If you agree to participate, please read the following instructions.  1. Please complete the questionnaire. There are no right or wrong answers; just provide honest responses. If you have any questions during the process, feel free to ask us. Once completed, please submit it in a timely manner.  2. This study involves a simple questionnaire and will not harm your physical or mental health. However, it will include some personal questions, such as your gender and age. We will strictly maintain confidentiality and will not disclose your information, so please feel confident in completing it.  3. As a participant, you can always inquire about information related to this study and its progress. If you choose to withdraw from the study, please inform us, and your data will not be included in the research results.  Finally, we sincerely thank you for taking the time to support our scientific research!  □I have been informed and agree to the use of the collected data for scientific research purposes.  Informed Consent Signature：  Date of Participation: Year Month Day | | | | | | | | | | | |
| --- | --- | --- | --- | --- | --- | --- | --- | --- | --- | --- | --- |
| **Part 1 Basic Information** | | | | | | | | | | | |
| 1. **Your age：** **years old** | | | | | | | | | | | |
| 1. **Your gender ：** | | a. Male  b. Female | | | | | | | | | |
| 1. **Place of residence：** | | a. Rural  b. Urban  c. Suburban | | | | | | | | | |
| 1. **Education level：** | | a. Primary school or below b. Junior high school c. High school/technical school d. Associate degree e. Bachelor's degree or above | | | | | | | | | |
| 1. **Job type：** | | a. Government or public institution b. Professional/Technical personnel (teachers, doctors, engineers, etc.) c. Enterprise employee d. Other | | | | | | | | | |
| 1. **Your household per capita monthly income: (in yuan)** | | a.<2000  b.2000-4999  c.5000-9999  d.≥10000 | | | | | | | | | |
| 1. **Duration of chronic lower limb ischemia:** | | a. <1 year b. 2-3 years c. 3-5 years d. >5 years | | | | | | | | | |
| 1. **The disease that caused your lower limb ischemia:** | | a. Arteriosclerosis obliterans b. Thromboangiitis obliterans c. Acute arterial embolism d. Diabetic foot e. Other | | | | | | | | | |
| 1. **What underlying diseases do you have? (Multiple answers possible)** | | a. Hyperlipidemia b. Hypertension c. Diabetes d. Coronary heart disease e. Other | | | | | | | | | |
| 1. **After being diagnosed with chronic lower limb ischemia, what treatments have you received? (Multiple answers possible)** | | a. Medication b. Surgery c. Endovascular treatment d. No treatment | | | | | | | | | |
| 1. **20+10=50** | | a. True b. False | | | | | | | | | |
| **Part 2 Knowledge of Disease Management** | | | | | | | | | |
| 1. **Chronic lower limb ischemia is often associated with cardiovascular diseases and can lead to severe stroke and myocardial infarction.** | | | | | a. very familiar | | b. heard of it | | c. not clear | | |
| 1. **Patients with chronic lower limb ischemia should change their lifestyle, such as avoiding prolonged sitting, quitting smoking, and managing diet and exercise.** | | | | | a. very familiar | | b. heard of it | | c. not clear | | |
| 1. **Patients with chronic lower limb ischemia who also have risk factors such as hyperlipidemia, hypertension, or diabetes should receive corresponding treatment.** | | | | | a. very familiar | | b. heard of it | | c. not clear | | |
| 1. **Patients with chronic lower limb ischemia should undergo antithrombotic therapy.** | | | | | a. very familiar | | b. heard of it | | c. not clear | | |
| 1. **Patients with chronic lower limb ischemia and severe chronic pain can use painkillers.** | | | | | a. very familiar | | b. heard of it | | c. not clear | | |
| 1. **Chronic limb-threatening ischemia refers to ischemic disease of the lower limbs combined with rest pain, gangrene, or ulcers lasting more than 2 weeks.** | | | | | a. very familiar | | b. heard of it | | c. not clear | | |
| 1. **Unless there are special circumstances, patients with chronic limb-threatening ischemia generally receive limb-preserving treatment.** | | | | | a. very familiar | | b. heard of it | | c. not clear | | |
| 1. **Revascularization is an important treatment for chronic limb-threatening ischemia** **patients to relieve symptoms and promote wound healing, including surgical treatment and endovascular therapy.** | | | | | a. very familiar | | b. heard of it | | c. not clear | | |
| 1. **Patients with chronic limb-threatening ischemia can consider revascularization treatment.** | | | | | a. very familiar | | b. heard of it | | c. not clear | | |
| 1. **After undergoing revascularization, patients with chronic lower limb ischemia should undergo long-term monitoring of their lower limb condition.** | | | | | a. very familiar | | b. heard of it | | c. not clear | | |
| **Part 3 Attitudes Toward Disease Management** | | | | | | | | | | | | |
| 1. **Do you think chronic limb ischemia may threaten life and requires serious attention to disease management?** | | a. strongly agree | b. agree | c. neutral | | d. disagree | | e. strongly disagree | | | | |
| 1. **Do you think chronic limb ischemia has a significant impact on your work?** | | a. strongly agree | b. agree | c. neutral | | d. disagree | | e. strongly disagree | | | | |
| 1. **Do you think chronic lower limb ischemia is unrelated to lifestyle factors such as prolonged sitting and smoking?** | | a. strongly agree | b. agree | c. neutral | | d. disagree | | e. strongly disagree | | | | |
| 1. **Do you think it is important for patients with chronic ischemia to focus on managing underlying diseases, such as cardiovascular diseases?** | | a. strongly agree | b. agree | c. neutral | | d. disagree | | e. strongly disagree | | | | |
| 1. **Do you think that after revascularization, lower limb ischemia will not recur?** | | a. strongly agree | b. agree | c. neutral | | d. disagree | | e. strongly disagree | | | | |
| 1. **Do you think it is important to pay attention to post-operative care if undergoing revascularization treatment?** | | a. strongly agree | b. agree | c. neutral | | d. disagree | | e. strongly disagree | | | | |
| 1. **Are you concerned that chronic lower limb ischemia will relapse after treatment?** | | a. strongly agree | b. agree | c. neutral | | d. disagree | | e. strongly disagree | | | | |
| 1. **Do you think it is necessary to regularly follow up on the condition of chronic lower limb ischemia according to the doctor's instructions?** | | a. strongly agree | b. agree | c. neutral | | d. disagree | | e. strongly disagree | | | | |
| 1. **Do you think it is important to actively learn about the management of chronic lower limb ischemia?** | | a. strongly agree | b. agree | c. neutral | | d. disagree | | e. strongly disagree | | | | |

| **Part 4 Practice Toward Disease Management**  8 or more out of 10 occurrences = "Always", 5-7 occurrences = "Often”, 3-4 occurrences = "Sometimes" ,1-2 occurrences = "Occasionally", 0 occurrences = "Never" | | | | | | |
| --- | --- | --- | --- | --- | --- | --- |
| 1. **Do you follow medical advice for managing chronic lower limb ischemia, such as taking medication on time and attending regular follow-ups?** | a. always | b. often | c. sometimes | d. occasionally | e. never | |
| 1. **Do you maintain a positive attitude when managing chronic lower limb ischemia?** | a. always | b. often | c. sometimes | d. occasionally | e. never | |
| 1. **To prevent worsening of lower limb ischemia, do you avoid prolonged sitting, quit smoking, and manage your diet and exercise?** | a. always | b. often | c. sometimes | d. occasionally | e. never | |
| 1. **When treating chronic lower limb ischemia, do you also treat cardiovascular diseases such as controlling cholesterol, blood pressure, and blood sugar?** | a. always | b. often | c. sometimes | d. occasionally | e. never | |
| 1. **Do you pay attention to the care of the affected limb, such as keeping it warm?** | a. always | b. often | c. sometimes | d. occasionally | e. never | |
| 1. **Do you actively learn about the management of chronic lower limb ischemia through television, newspapers, magazines, the internet, or professional books?** | a. always | b. often | c. sometimes | d. occasionally | e. never | |
| 1. **Do you actively consult healthcare professionals about managing chronic lower limb ischemia?** | a. always | b. often | c. sometimes | d. occasionally | e. never | |
| 1. **If chronic lower limb ischemia recurs after discharge, would you immediately seek medical attention?** | a. always | b. often | c. sometimes | d. occasionally | e. never | |
| **Part 5 Brief Illness Perception Questionnaire**  **Please rate your feelings about your disease from 0 to 10.** | | | | | | |
| 1. **How much does your disease impact your life? (0 = no impact, 10 = severe impact)** | | | | | | |
| 1. **How long do you think your disease will last? (0 = very short time, 10 = forever)** | | | | | | |
| 1. **To what extent do you feel you can control your disease? (0 = absolutely no control, 10 = complete control)** | | | | | | |
| 1. **To what extent do you think the treatment you're receiving helps with your disease? (0 = no help, 10 = extremely helpful)** | | | | | | |
| 1. **How severe were the symptoms after you were diagnosed with the disease? (0 = no symptoms, 10 = many severe symptoms)** | | | | | | |
| 1. **How much attention do you pay to your disease? (0 = no attention, 10 = extreme attention)** | | | | | | |
| 1. **To what extent do you feel you understand your disease? (0 = no understanding, 10 = full understanding)** | | | | | | |
| 1. **To what extent does the disease affect your emotions? (0 = no emotional impact, 10 = extremely emotional impact)** | | | | | | |

**Supplementary Table 1. Post hoc pairwise comparisons using Dunn’s test with Bonferroni correction**

| Variable | Comparison | Knowledge | | | Attitude | | | Practice | | |
| --- | --- | --- | --- | --- | --- | --- | --- | --- | --- | --- |
| Statistic | P | Bonferroni P | Statistic | P | Bonferroni P | Statistic | P | Bonferroni P |
| Age | Under 60 VS 60–69 years | 0.498 | 0.309 | 1.0 |  |  |  |  |  |  |
| Under 60 VS 70–79 years | 2.26 | 0.012 | 0.071 |  |  |  |  |  |  |
| 60–69 VS 70–79 years | 2.134 | 0.016 | 0.098 |  |  |  |  |  |  |
| Under 60 VS 80+ years | 1.854 | 0.032 | 0.191 |  |  |  |  |  |  |
| 60–69 VS 80+ years | 1.621 | 0.052 | 0.315 |  |  |  |  |  |  |
| 70–79 VS 80+ years | -0.296 | 0.384 | 1.0 |  |  |  |  |  |  |
| Residence | Rural VS Urban | -9.963 | <0.001 | <0.001 | -5.993 | <0.001 | <0.001 | -8.626 | <0.001 | <0.001 |
| Rural VS Suburban | -4.511 | <0.001 | <0.001 | -2.994 | 0.001 | 0.004 | -3.198 | 0.001 | 0.002 |
| Urban VS Suburban | 3.123 | 0.001 | 0.003 | 1.573 | 0.058 | 0.174 | 3.475 | <0.001 | 0.001 |
| Education | Primary vs Junior high | -2.993 | 0.001 | 0.014 | -0.813 | 0.208 | 1.0 | -5.645 | <0.001 | <0.001 |
| Primary vs Senior high | -7.089 | <0.001 | <0.001 | -4.895 | <0.001 | <0.001 | -6.724 | <0.001 | <0.001 |
| Junior high vs Senior high | -3.736 | <0.001 | 0.001 | -3.668 | <0.001 | 0.001 | -1.105 | 0.135 | 1.000 |
| Primary vs Junior college | -6.985 | <0.001 | <0.001 | -4.579 | <0.001 | <0.001 | -4.434 | <0.001 | <0.001 |
| Junior high vs Junior college | -4.686 | <0.001 | <0.001 | -3.804 | <0.001 | 0.001 | -0.584 | 0.279 | 1.000 |
| Senior high vs Junior college | -1.918 | 0.028 | 0.275 | -1.097 | 0.136 | 1.0 | 0.225 | 0.411 | 1.000 |
| Primary vs Bachelor+ | -6.287 | <0.001 | <0.001 | -3.736 | <0.001 | 0.001 | -5.926 | <0.001 | <0.001 |
| Junior high vs Bachelor+ | -4.661 | <0.001 | <0.001 | -3.231 | 0.001 | 0.006 | -3.042 | 0.001 | 0.012 |
| Senior high vs Bachelor+ | -2.586 | 0.005 | 0.049 | -1.203 | 0.114 | 1.0 | -2.417 | 0.008 | 0.078 |
| Junior college vs Bachelor+ | -1.018 | 0.154 | 1.0 | -0.336 | 0.368 | 1.0 | -2.308 | 0.010 | 0.105 |
| Occupation | Govt staff VS Technical | 0.873 | 0.191 | 1.0 | -0.283 | 0.389 | 1.0 | 0.019 | 0.493 | 1.000 |
| Govt staff VS Enterprise | 2.845 | 0.002 | 0.013 | 1.428 | 0.077 | 0.46 | 1.304 | 0.096 | 0.576 |
| Technical VS Enterprise | 2.024 | 0.021 | 0.129 | 1.891 | 0.029 | 0.176 | 1.391 | 0.082 | 0.492 |
| Govt staff VS Others | 6.597 | <0.001 | <0.001 | 4.879 | <0.001 | <0.001 | 3.819 | <0.001 | <0.001 |
| Technical VS Others | 6.105 | <0.001 | <0.001 | 5.822 | <0.001 | <0.001 | 4.219 | <0.001 | <0.001 |
| Enterprise VS Others | 4.856 | <0.001 | <0.001 | 4.69 | <0.001 | <0.001 | 3.367 | <0.001 | 0.002 |
| Income | <2,000 VS 2,000-4,999 | -4.948 | <0.001 | <0.001 | -3.32 | <0.001 | 0.001 | -3.14 | 0.001 | 0.003 |
| <2,000 VS >5,000 | -9.467 | <0.001 | <0.001 | -6.317 | <0.001 | <0.001 | -6.931 | <0.001 | <0.001 |
| 2,000-4,999 VS >5,000 | -6.047 | <0.001 | <0.001 | -4.013 | <0.001 | <0.001 | -5.017 | <0.001 | <0.001 |

**Supplementary Table 2. Distribution of knowledge dimension responses**

| **Items, n (%)** | Very familiar | Heard of it | Not clear |
| --- | --- | --- | --- |
| 1. Chronic lower limb ischemia is often associated with cardiovascular diseases and can lead to severe stroke and myocardial infarction. | 108(22%) | 159(32.4%) | 224(45.6%) |
| 1. Patients with chronic lower limb ischemia should change their lifestyle, such as avoiding prolonged sitting, quitting smoking, and managing diet and exercise. | 207(42.2%) | 197(40.1%) | 87(17.7%) |
| 1. Patients with chronic lower limb ischemia who also have risk factors such as hyperlipidemia, hypertension, or diabetes should receive corresponding treatment. | 209(42.6%) | 186(37.9%) | 96(19.6%) |
| 1. Patients with chronic lower limb ischemia should undergo antithrombotic therapy. | 82(16.7%) | 141(28.7%) | 268(54.6%) |
| 1. Patients with chronic lower limb ischemia and severe chronic pain can use painkillers. | 210(42.8%) | 173(35.2%) | 108(22%) |
| 1. Chronic limb-threatening ischemia refers to ischemic disease of the lower limbs combined with rest pain, gangrene, or ulcers lasting more than 2 weeks. | 92(18.7%) | 184(37.5%) | 215(43.8%) |
| 1. Unless there are special circumstances, patients with chronic limb-threatening ischemia generally receive limb-preserving treatment. | 164(33.4%) | 171(34.8%) | 156(31.8%) |
| 1. Revascularization is an important treatment for chronic limb-threatening ischemia patients to relieve symptoms and promote wound healing, including surgical treatment and endovascular therapy. | 67(13.6%) | 157(32%) | 267(54.4%) |
| 1. Patients with chronic limb-threatening ischemia can consider revascularization treatment. | 67(13.6%) | 133(27.1%) | 291(59.3%) |
| 1. After undergoing revascularization, patients with chronic lower limb ischemia should undergo long-term monitoring of their lower limb condition. | 109(22.2%) | 148(30.1%) | 234(47.7%) |

**Supplementary Table 3. Distribution of attitude dimension responses**

| **Items, n (%)** | Strongly agree | Agree | Neutral | Disagree | Strongly disagree |
| --- | --- | --- | --- | --- | --- |
| 1. Do you think chronic limb ischemia may threaten life and requires serious attention to disease management? | 135(27.5%) | 331(67.4%) | 22(4.5%) | 1(0.2%) | 2(0.4%) |
| 1. Do you think chronic limb ischemia has a significant impact on your work? | 97(19.8%) | 321(65.4%) | 28(5.7%) | 44(9%) | 1(0.2%) |
| 1. Do you think chronic lower limb ischemia is unrelated to lifestyle factors such as prolonged sitting and smoking? | 27(5.5%) | 116(23.6%) | 51(10.4%) | 278(56.6%) | 19(3.9%) |
| 1. Do you think it is important for patients with chronic ischemia to focus on managing underlying diseases, such as cardiovascular diseases? | 131(26.7%) | 317(64.6%) | 33(6.7%) | 10(2%) | 0 (0%) |
| 1. Do you think that after revascularization, lower limb ischemia will not recur? | 18(3.7%) | 130(26.5%) | 55(11.2%) | 271(55.2%) | 17(3.5%) |
| 1. Do you think it is important to pay attention to post-operative care if undergoing revascularization treatment? | 122(24.8%) | 332(67.6%) | 31(6.3%) | 6(1.2%) | 0 (0%) |
| 1. Are you concerned that chronic lower limb ischemia will relapse after treatment? | 88(17.9%) | 328(66.8%) | 29(5.9%) | 44(9%) | 2(0.4%) |
| 1. Do you think it is necessary to regularly follow up on the condition of chronic lower limb ischemia according to the doctor's instructions? | 139(28.3%) | 321(65.4%) | 28(5.7%) | 3(0.6%) | 0 (0%) |
| 1. Do you think it is important to actively learn about the management of chronic lower limb ischemia? | 108(22%) | 335(68.2%) | 38(7.7%) | 9(1.8%) | 1(0.2%) |

**Supplementary Table 4. Distribution of Disease Perception Scale**

| **Items, n (%)** | 0 | 1 | 2 | 3 | 4 | 5 | 6 | 7 | 8 | 9 | 10 |
| --- | --- | --- | --- | --- | --- | --- | --- | --- | --- | --- | --- |
| 1. How much does your disease impact your life? (0 = no impact, 10 = severe impact) | 7(1.4%) | 21(4.3%) | 44(9%) | 46(9.4%) | 23(4.7%) | 69(14.1%) | 71(14.5%) | 57(11.6%) | 85(17.3%) | 24(4.9%) | 44(9%) |
| 1. How long do you think your disease will last? (0 = very short time, 10 = forever) | 5(1%) | 22(4.5%) | 47(9.6%) | 41(8.4%) | 32(6.5%) | 74(15.1%) | 42(8.6%) | 55(11.2%) | 72(14.7%) | 33(6.7%) | 68(13.8%) |
| 1. To what extent do you feel you can control your disease? (0 = absolutely no control, 10 = complete control) | 1(0.2%) | 4(0.8%) | 5(1%) | 24(4.9%) | 26(5.3%) | 72(14.7%) | 45(9.2%) | 52(10.6%) | 129(26.3%) | 88(17.9%) | 45(9.2%) |
| 1. To what extent do you think the treatment you're receiving helps with your disease? (0 = no help, 10 = extremely helpful) | 1(0.2%) | 3(0.6%) | 3(0.6%) | 8(1.6%) | 19(3.9%) | 59(12%) | 50(10.2%) | 49(10%) | 125(25.5%) | 101(20.6%) | 73(14.9%) |
| 1. How severe were the symptoms after you were diagnosed with the disease? (0 = no symptoms, 10 = many severe symptoms) | 2(0.4%) | 6(1.2%) | 20(4.1%) | 59(12%) | 26(5.3%) | 118(24%) | 84(17.1%) | 45(9.2%) | 64(13%) | 31(6.3%) | 36(7.3%) |
| 1. How much attention do you pay to your disease? (0 = no attention, 10 = extreme attention) | 0 (0%) | 2(0.4%) | 8(1.6%) | 7(1.4%) | 16(3.3%) | 30(6.1%) | 47(9.6%) | 50(10.2%) | 119(24.2%) | 70(14.3%) | 142(28.9%) |
| 1. To what extent do you feel you understand your disease? (0 = no understanding, 10 = full understanding) | 1(0.2%) | 7(1.4%) | 28(5.7%) | 54(11%) | 47(9.6%) | 111(22.6%) | 50(10.2%) | 48(9.8%) | 92(18.7%) | 31(6.3%) | 22(4.5%) |
| 1. To what extent does the disease affect your emotions? (0 = no emotional impact, 10 = extremely emotional impact) | 10(2%) | 13(2.6%) | 63(12.8%) | 86(17.5%) | 37(7.5%) | 123(25.1%) | 47(9.6%) | 40(8.1%) | 47(9.6%) | 15(3.1%) | 10(2%) |

**Supplementary Table 5. Distribution of practice dimension responses**

| **Items, n (%)** | Always | Often | Sometimes | Occasionally | Never |
| --- | --- | --- | --- | --- | --- |
| 1. Do you follow medical advice for managing chronic lower limb ischemia, such as taking medication on time and attending regular follow-ups? | 222(45.2%) | 216(44%) | 38(7.7%) | 12(2.4%) | 3(0.6%) |
| 1. Do you maintain a positive attitude when managing chronic lower limb ischemia? | 184(37.5%) | 253(51.5%) | 39(7.9%) | 15(3.1%) | 0 (0%) |
| 1. To prevent worsening of lower limb ischemia, do you avoid prolonged sitting, quit smoking, and manage your diet and exercise? | 201(40.9%) | 221(45%) | 52(10.6%) | 15(3.1%) | 2(0.4%) |
| 1. When treating chronic lower limb ischemia, do you also treat cardiovascular diseases such as controlling cholesterol, blood pressure, and blood sugar? | 197(40.1%) | 240(48.9%) | 40(8.1%) | 8(1.6%) | 6(1.2%) |
| 1. Do you pay attention to the care of the affected limb, such as keeping it warm? | 280(57%) | 140(28.5%) | 47(9.6%) | 18(3.7%) | 6(1.2%) |
| 1. Do you actively learn about the management of chronic lower limb ischemia through television, newspapers, magazines, the internet, or professional books? | 44(9%) | 81(16.5%) | 127(25.9%) | 162(33%) | 77(15.7%) |
| 1. Do you actively consult healthcare professionals about managing chronic lower limb ischemia? | 71(14.5%) | 165(33.6%) | 137(27.9%) | 91(18.5%) | 27(5.5%) |
| 1. If chronic lower limb ischemia recurs after discharge, would you immediately seek medical attention? | 150(30.5%) | 248(50.5%) | 74(15.1%) | 14(2.9%) | 5(1%) |

**Supplementary Table 6. Correlation analysis**

| **Spearman** | **Knowledge** | **Attitude** | **Practice** | **Disease Perception Scale** |
| --- | --- | --- | --- | --- |
| **Knowledge** | 1.000 |  |  |  |
| **Attitude** | 0.513 (0.445, 0.576) (P<0.001) | 1.000 |  |  |
| **Practice** | 0.448 (0.375, 0.516) (P<0.001) | 0.331 (0.250, 0.407) (P<0.001) | 1.000 |  |
| **Disease Perception Scale** | 0.175 (0.144, 0.312) (P<0.001) | 0.227 (0.189, 0.353) (P<0.001) | 0.056 (-0.032, 0.144) (P=0.061) | 1.000 |

**Supplementary Table 7. Goodness-of-fit indicators for path analysis in all participants**

| **Indicators** | **Reference** | **Results** |
| --- | --- | --- |
| IFI | <0.09 | 0.956 |
| SRMR | <0.08 | 0.046 |
| NFI | >0.90 | 0.953 |
| CFI | >0.80 | 0.956 |

Abbreviations: IFI = Incremental Fit Index; SRMR = Standardized Root Mean Square Residual; NFI = Normed Fit Index; CFI = Comparative Fit Index.

**Supplementary Table 8. Subgroup path analysis adjusted for education level and urban/rural residence**

| **Model paths** | | Total effects | | Direct Effect | | Indirect effect | |
| --- | --- | --- | --- | --- | --- | --- | --- |
| β (95%CI) | P | β (95% CI) | P | β (95%CI) | P |
| Attitude |  |  |  |  |  |  |  |
|  | Knowledge | 0.472 (0.393, 0.552) | <0.001 | 0.472 (0.393, 0.552) | <0.001 |  |  |
| Awareness |  |  |  |  |  |  |  |
|  | Knowledge | 0.197 (0.099, 0.295) | <0.001 | 0.197 (0.099, 0.295) | <0.001 |  |  |
| Practice |  |  |  |  |  |  |  |
|  | Knowledge | 0.316 (0.230, 0.402) | <0.001 | 0.243 (0.146, 0.340) | <0.001 | 0.073 (0.029, 0.118) | 0.001 |
|  | Attitude | 0.156 (0.065, 0.247) | <0.001 | 0.156 (0.065, 0.247) | <0.001 |  |  |
|  | Awareness | -0.002 (-0.082, 0.078) | 0.965 | -0.002 (-0.082, 0.078) | 0.965 |  |  |

**Supplementary Table 9. Multivariable logistic regression analyses for good knowledge (Ksum ≥ 9 vs Ksum ≤ 8)**

| **Knowledge** | Univariate analysis |  | Multivariate analysis |  |
| --- | --- | --- | --- | --- |
| OR (95% CI) | P | OR (95% CI) | P |
| **1. Your age:** |  |  |  |  |
| Under 60 years |  |  |  |  |
| 60–69 years | 0.949 (0.512,1.744) | 0.867 | 1.077 (0.516,2.246) | 0.844 |
| 70–79 years | 0.515 (0.289,0.907) | 0.023 | 0.510 (0.250,1.038) | 0.063 |
| 80 years and above | 0.605 (0.324,1.117) | 0.111 | 0.605 (0.275,1.331) | 0.212 |
| **2. Your gender:** |  |  |  |  |
| Male |  |  |  |  |
| Female | 0.388 (0.253,0.587) | <0.001 | 0.513 (0.308,0.854) | 0.010 |
| **3. Your place of residence:** |  |  |  |  |
| Rural |  |  |  |  |
| Urban | 8.160 (5.136,13.277) | <0.001 | 3.377 (1.850,6.164) | <0.001 |
| Suburban | 3.559 (1.981,6.477) | <0.001 | 2.095 (1.050,4.178) | 0.036 |
| **4. Your educational level:** |  |  |  |  |
| Primary school or below |  |  |  |  |
| Junior high school | 1.847 (1.161,2.945) | 0.010 | 0.757 (0.421,1.360) | 0.351 |
| Senior high school / Secondary vocational school | 4.450 (2.719,7.408) | <0.001 | 1.146 (0.563,2.329) | 0.708 |
| Junior college | 11.928 (5.112,32.773) | <0.001 | 2.270 (0.723,7.129) | 0.160 |
| Bachelor’s degree or above | 38.851 (7.807,705.465) | <0.001 | 6.264 (0.692,56.730) | 0.103 |
| **5. Your occupation type:** |  |  |  |  |
| Government/public institution staff |  |  |  |  |
| Professional/technical personnel | 0.660 (0.187,2.112) | 0.493 | 1.199 (0.299,4.810) | 0.798 |
| Enterprise employee | 0.297 (0.094,0.784) | 0.022 | 0.594 (0.168,2.096) | 0.418 |
| Others | 0.099 (0.033,0.239) | <0.001 | 0.436 (0.130,1.468) | 0.180 |
| **6. Your household per capita monthly income (RMB):** |  |  |  |  |
| <2,000 |  |  |  |  |
| 2,000-4,999 | 3.600 (2.041,6.654) | <0.001 | 1.503 (0.757,2.983) | 0.244 |
| >5,000 | 14.559 (7.887,28.179) | <0.001 | 3.559 (1.631,7.765) | 0.001 |
| **7. Duration of chronic lower limb ischemia (years):** |  |  |  |  |
| <1 |  |  |  |  |
| 2-3 | 1.336 (0.891,2.007) | 0.162 |  |  |
| 3-5 | 0.902 (0.503,1.611) | 0.728 |  |  |
| >5 | 0.652 (0.298,1.379) | 0.269 |  |  |
| **10-1. After being diagnosed with chronic lower limb ischemia, have you received medication therapy?** |  |  |  |  |
| Medication therapy: No |  |  |  |  |
| Medication therapy: Yes | 1.608 (0.975,2.682) | 0.065 | 0.869 (0.460,1.640) | 0.664 |
| **10-1. After being diagnosed with chronic lower limb ischemia, have you received surgical treatment?** |  |  |  |  |
| Surgical treatment: No |  |  |  |  |
| Surgical treatment: Yes | 0.745 (0.441,1.248) | 0.265 |  |  |
| **10-1. After being diagnosed with chronic lower limb ischemia, have you received endovascular treatment?** |  |  |  |  |
| Endovascular treatment: No |  |  |  |  |
| Endovascular treatment: Yes | 3.396 (2.203,5.324) | <0.001 | 3.725 (2.135,6.501) | <0.001 |

**Supplementary Table 10. Multivariable logistic regression analyses for good attitude (Asum ≥ 32 vs Asum ≤ 31)**

| **Attitude** | Univariate analysis |  | Multivariate analysis |  |
| --- | --- | --- | --- | --- |
| OR (95% CI) | P | OR (95% CI) | P |
| **Knowledge** | 1.207 (1.158,1.258) | <0.001 | 1.178 (1.120,1.240) | <0.001 |
| **1. Your age:** |  |  |  |  |
| Under 60 years |  |  |  |  |
| 60–69 years | 1.055 (0.579,1.921) | 0.861 |  |  |
| 70–79 years | 1.294 (0.736,2.273) | 0.369 |  |  |
| 80 years and above | 1.302 (0.706,2.404) | 0.398 |  |  |
| **2. Your gender:** |  |  |  |  |
| Male |  |  |  |  |
| Female | 0.576 (0.384,0.863) | 0.008 | 1.005 (0.615,1.641) | 0.985 |
| **3. Your place of residence:** |  |  |  |  |
| Rural |  |  |  |  |
| Urban | 2.610 (1.730,3.965) | <0.001 | 0.818 (0.451,1.482) | 0.507 |
| Suburban | 2.124 (1.226,3.720) | 0.008 | 1.066 (0.540,2.103) | 0.854 |
| **4. Your educational level:** |  |  |  |  |
| Primary school or below |  |  |  |  |
| Junior high school | 0.949 (0.602,1.495) | 0.822 | 0.526 (0.301,0.918) | 0.024 |
| Senior high school / Secondary vocational school | 2.794 (1.709,4.651) | <0.001 | 1.088 (0.540,2.191) | 0.813 |
| Junior college | 3.488 (1.676,7.838) | 0.001 | 0.967 (0.347,2.690) | 0.948 |
| Bachelor’s degree or above | 4.500 (1.587,16.122) | 0.009 | 0.976 (0.234,4.075) | 0.974 |
| **5. Your occupation type:** |  |  |  |  |
| Government/public institution staff |  |  |  |  |
| Professional/technical personnel | 1.165 (0.393,3.413) | 0.780 | 1.475 (0.406,5.362) | 0.555 |
| Enterprise employee | 0.613 (0.236,1.468) | 0.289 | 1.022 (0.326,3.202) | 0.971 |
| Others | 0.234 (0.097,0.506) | 0.001 | 0.599 (0.202,1.774) | 0.355 |
| **6. Your household per capita monthly income (RMB):** |  |  |  |  |
| <2,000 |  |  |  |  |
| 2,000-4,999 | 2.369 (1.439,3.961) | 0.001 | 1.287 (0.687,2.410) | 0.432 |
| >5,000 | 4.418 (2.595,7.658) | <0.001 | 1.241 (0.581,2.649) | 0.577 |
| **7. Duration of chronic lower limb ischemia (years):** |  |  |  |  |
| <1 |  |  |  |  |
| 2-3 | 0.930 (0.616,1.400) | 0.728 | 0.806 (0.483,1.345) | 0.409 |
| 3-5 | 0.717 (0.400,1.285) | 0.263 | 0.699 (0.355,1.379) | 0.302 |
| >5 | 0.487 (0.225,1.028) | 0.061 | 0.586 (0.246,1.398) | 0.229 |
| **10-1. After being diagnosed with chronic lower limb ischemia, have you received medication therapy?** |  |  |  |  |
| Medication therapy: No |  |  |  |  |
| Medication therapy: Yes | 2.637 (1.584,4.475) | <0.001 | 2.432 (1.302,4.542) | 0.005 |
| **10-1. After being diagnosed with chronic lower limb ischemia, have you received surgical treatment?** |  |  |  |  |
| Surgical treatment: No |  |  |  |  |
| Surgical treatment: Yes | 0.908 (0.541,1.529) | 0.713 |  |  |
| **10-1. After being diagnosed with chronic lower limb ischemia, have you received endovascular treatment?** |  |  |  |  |
| Endovascular treatment: No |  |  |  |  |
| Endovascular treatment: Yes | 2.992 (1.966,4.604) | <0.001 | 1.803 (1.082,3.005) | 0.024 |

**Supplementary Table 11. Multivariable logistic regression analyses for good practice (Psum ≥ 31 vs Psum ≤ 30)**

| **Practice** | Univariate analysis |  | Multivariate analysis |  |
| --- | --- | --- | --- | --- |
| OR (95% CI) | P | OR (95% CI) | P |
| **Knowledge** | 1.175 (1.129,1.223) | <0.001 | 1.110 (1.052,1.170) | <0.001 |
| **Attitude** | 1.195 (1.117,1.278) | <0.001 | 1.072 (0.982,1.171) | 0.120 |
| **1. Your age:** |  |  |  |  |
| Under 60 years |  |  |  |  |
| 60–69 years | 1.038 (0.545,1.951) | 0.910 | 1.230 (0.592,2.554) | 0.579 |
| 70–79 years | 0.659 (0.362,1.174) | 0.163 | 0.949 (0.473,1.905) | 0.883 |
| 80 years and above | 0.537 (0.282,1.003) | 0.054 | 0.641 (0.296,1.390) | 0.260 |
| **2. Your gender:** |  |  |  |  |
| Male |  |  |  |  |
| Female | 0.461 (0.306,0.692) | <0.001 | 0.774 (0.474,1.263) | 0.305 |
| **3. Your place of residence:** |  |  |  |  |
| Rural |  |  |  |  |
| Urban | 5.167 (3.358,8.039) | <0.001 | 2.781 (1.539,5.024) | 0.001 |
| Suburban | 1.811 (1.044,3.155) | 0.035 | 1.220 (0.627,2.375) | 0.558 |
| **4. Your educational level:** |  |  |  |  |
| Primary school or below |  |  |  |  |
| Junior high school | 3.918 (2.414,6.479) | <0.001 | 2.513 (1.402,4.504) | 0.002 |
| Senior high school / Secondary vocational school | 3.790 (2.307,6.352) | <0.001 | 1.388 (0.691,2.787) | 0.356 |
| Junior college | 3.140 (1.564,6.600) | 0.002 | 0.743 (0.283,1.951) | 0.547 |
| Bachelor’s degree or above | 13.121 (3.657,83.945) | 0.001 | 2.521 (0.462,13.739) | 0.285 |
| **5. Your occupation type:** |  |  |  |  |
| Government/public institution staff |  |  |  |  |
| Professional/technical personnel | 0.550 (0.187,1.509) | 0.257 | 0.728 (0.226,2.353) | 0.596 |
| Enterprise employee | 0.547 (0.200,1.350) | 0.210 | 0.938 (0.310,2.834) | 0.909 |
| Others | 0.261 (0.103,0.580) | 0.002 | 1.215 (0.420,3.511) | 0.719 |
| **6. Your household per capita monthly income (RMB):** |  |  |  |  |
| <2,000 |  |  |  |  |
| 2,000-4,999 | 1.941 (1.189,3.199) | 0.009 | 0.864 (0.468,1.594) | 0.640 |
| >5,000 | 4.970 (2.899,8.661) | <0.001 | 1.264 (0.605,2.638) | 0.533 |
| **7. Duration of chronic lower limb ischemia (years):** |  |  |  |  |
| <1 |  |  |  |  |
| 2-3 | 1.138 (0.753,1.719) | 0.539 |  |  |
| 3-5 | 1.005 (0.560,1.819) | 0.986 |  |  |
| >5 | 0.905 (0.429,1.935) | 0.793 |  |  |
| **10-1. After being diagnosed with chronic lower limb ischemia, have you received medication therapy?** |  |  |  |  |
| Medication therapy: No |  |  |  |  |
| Medication therapy: Yes | 1.265 (0.763,2.085) | 0.358 |  |  |
| **10-1. After being diagnosed with chronic lower limb ischemia, have you received surgical treatment?** |  |  |  |  |
| Surgical treatment: No |  |  |  |  |
| Surgical treatment: Yes | 0.571 (0.339,0.958) | 0.034 | 0.702 (0.368,1.340) | 0.284 |
| **10-1. After being diagnosed with chronic lower limb ischemia, have you received endovascular treatment?** |  |  |  |  |
| Endovascular treatment: No |  |  |  |  |
| Endovascular treatment: Yes | 2.070 (1.371,3.138) | 0.001 | 1.136 (0.665,1.941) | 0.641 |


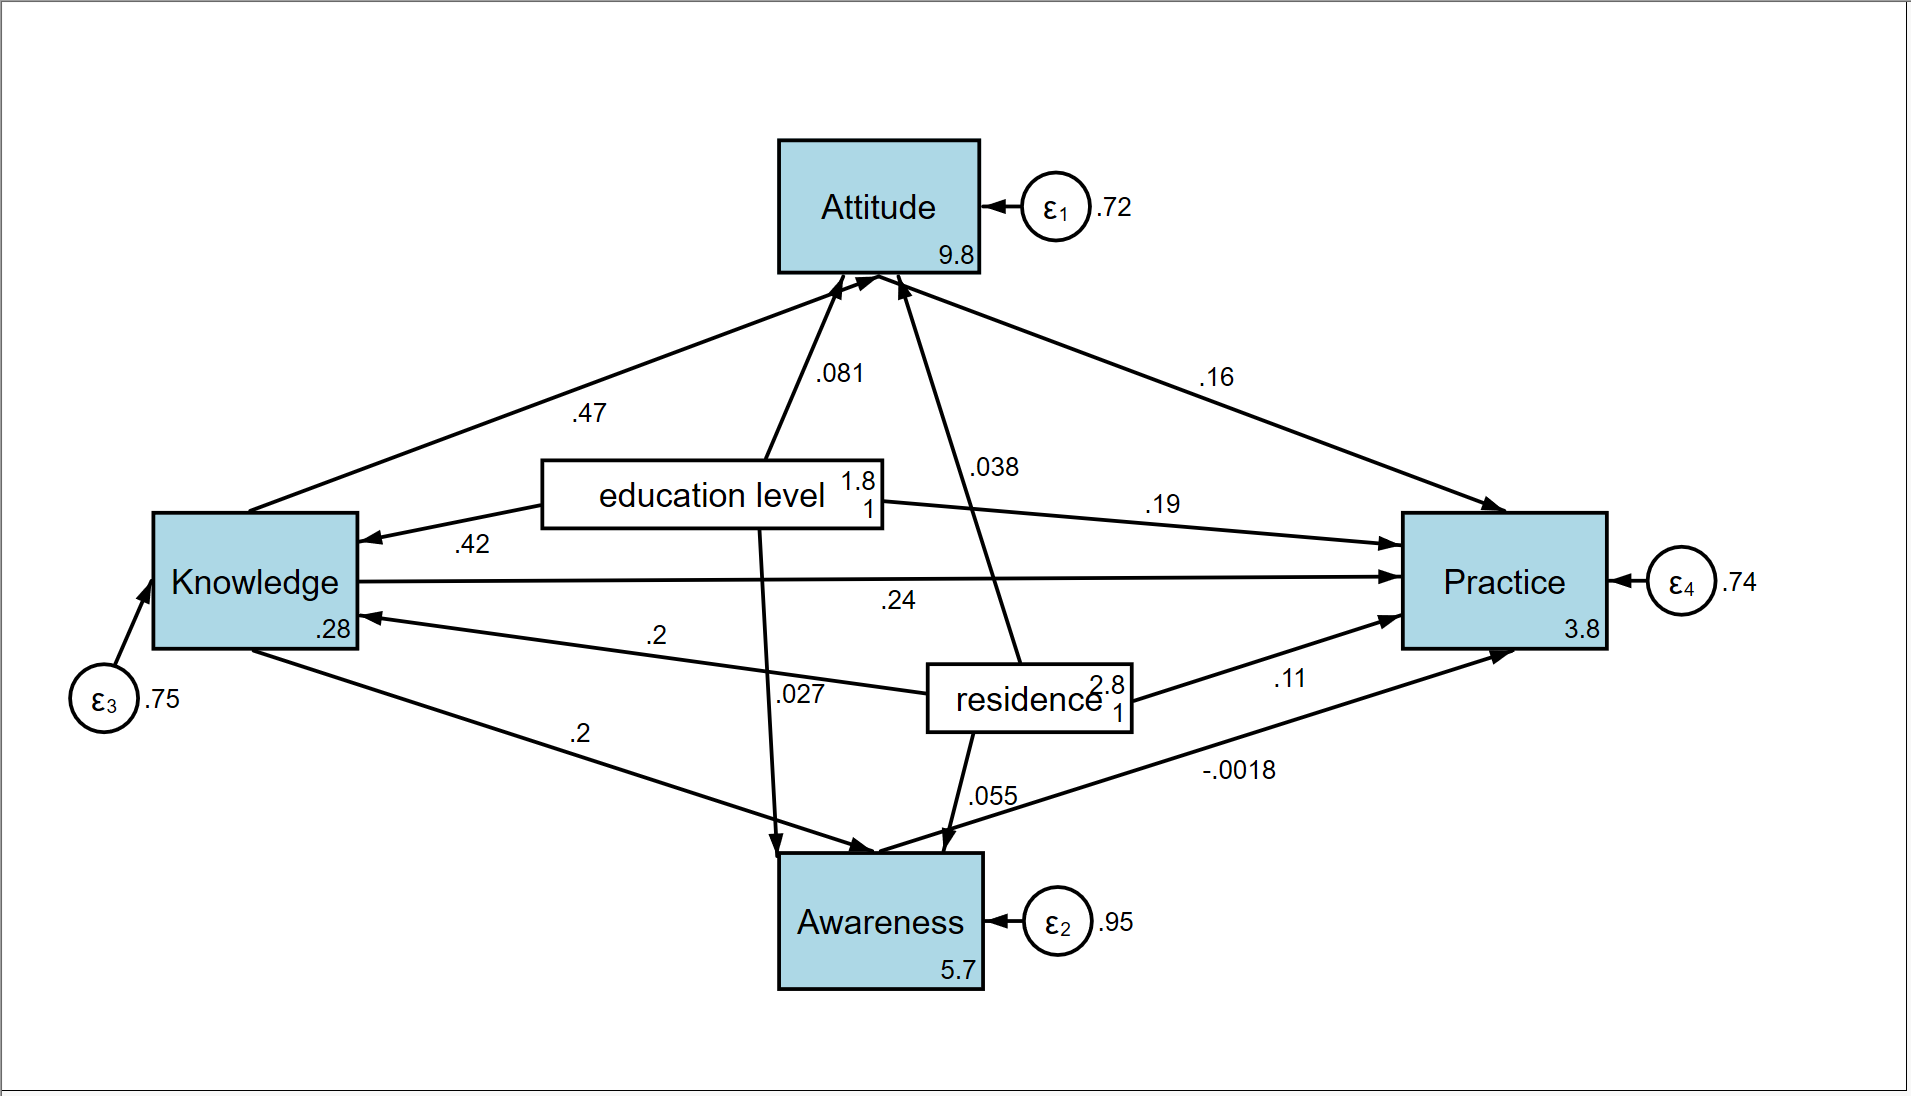


Supplementary Figure 1. Subgroup path analysis adjusted for education level and urban/rural residences.
